# Supplementary material for: Synthesis of zeolite Beta, MFI, and MTW using imidazole, piperidine, and pyridine based quaternary ammonium salts as structure directing agents
Source: Royal Society of Chemistry journal article supplement (doi:10.1039/c2ra20437a), 2012-01-01
Supplement: c2ra20437a.pdf [file c2ra20437a.pdf]

## Supporting information

### Synthesis of zeolite Beta, MFI, and MTW using imidazole, piperidine, and pyridine based quaternary ammonium salts as structure directing agents

Rajkumar Kore and Rajendra Srivastava\*

- Fig. S1.** XRD patterns of unknown silicate phases obtained using IL1, IL7, IL8, IL9, and IL10.
- Fig. S2.** Results of the IL11 simulation study at zeolite synthesis temperature (443 K).
- Fig. S3.** Structure of IL11 at different stages of nuclear kinetic energy/potential energy curve as indicated in Fig. S2.

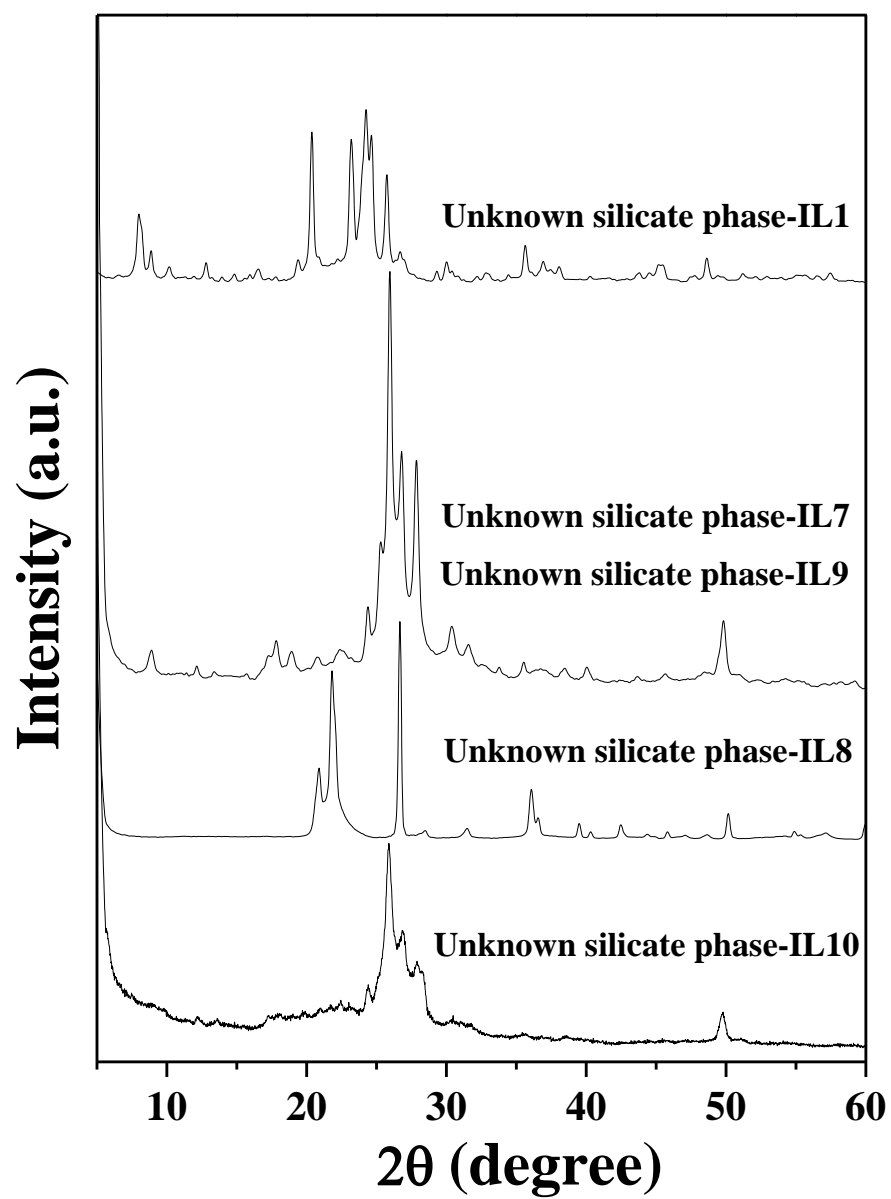

Fig. S1

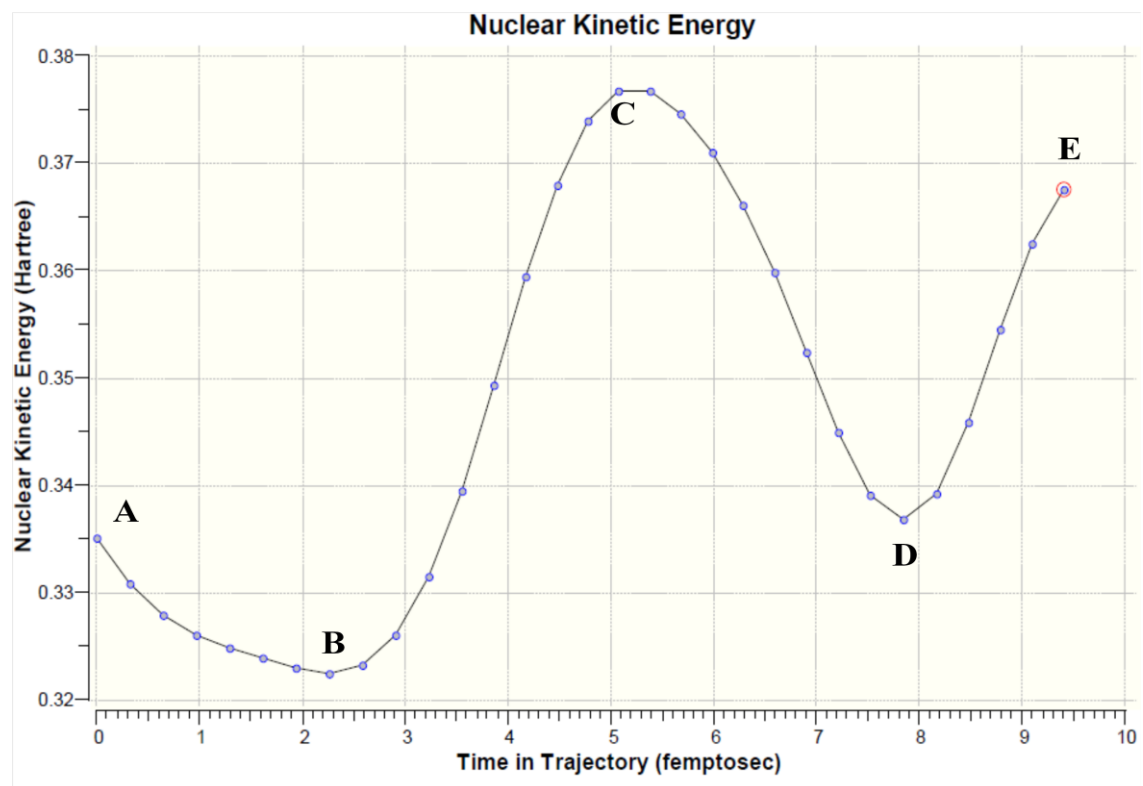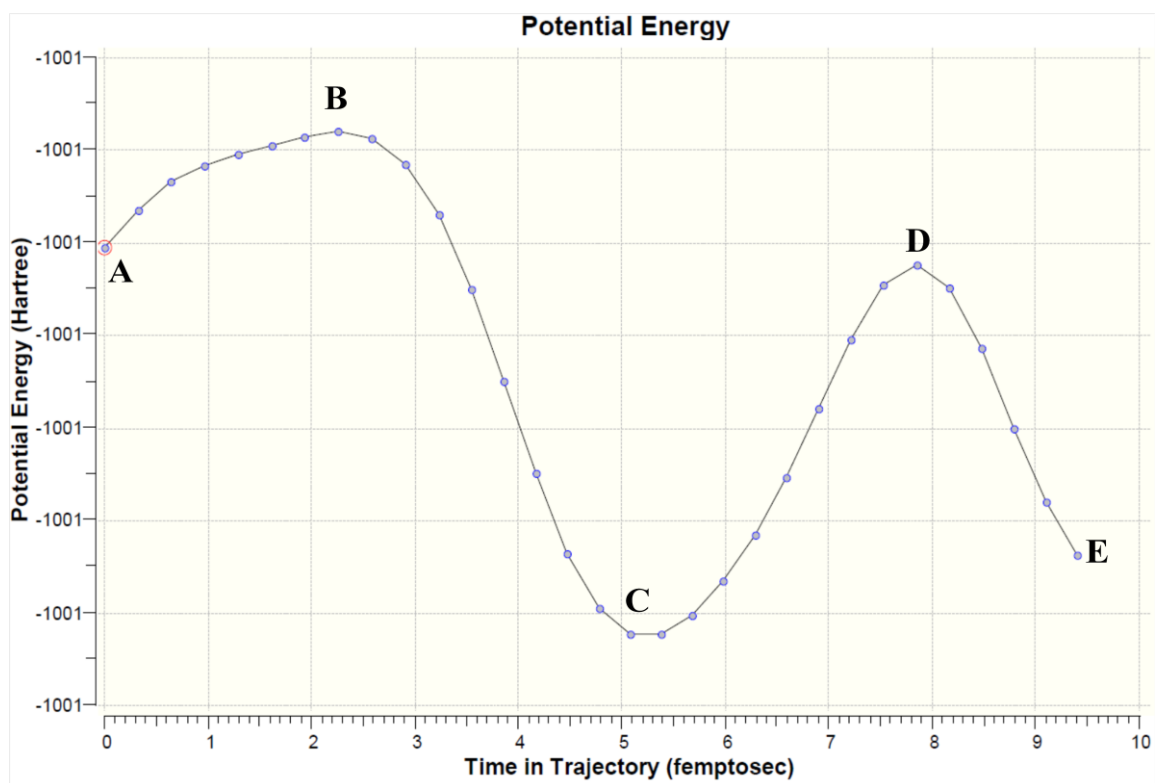

Fig. S2 (Continued)

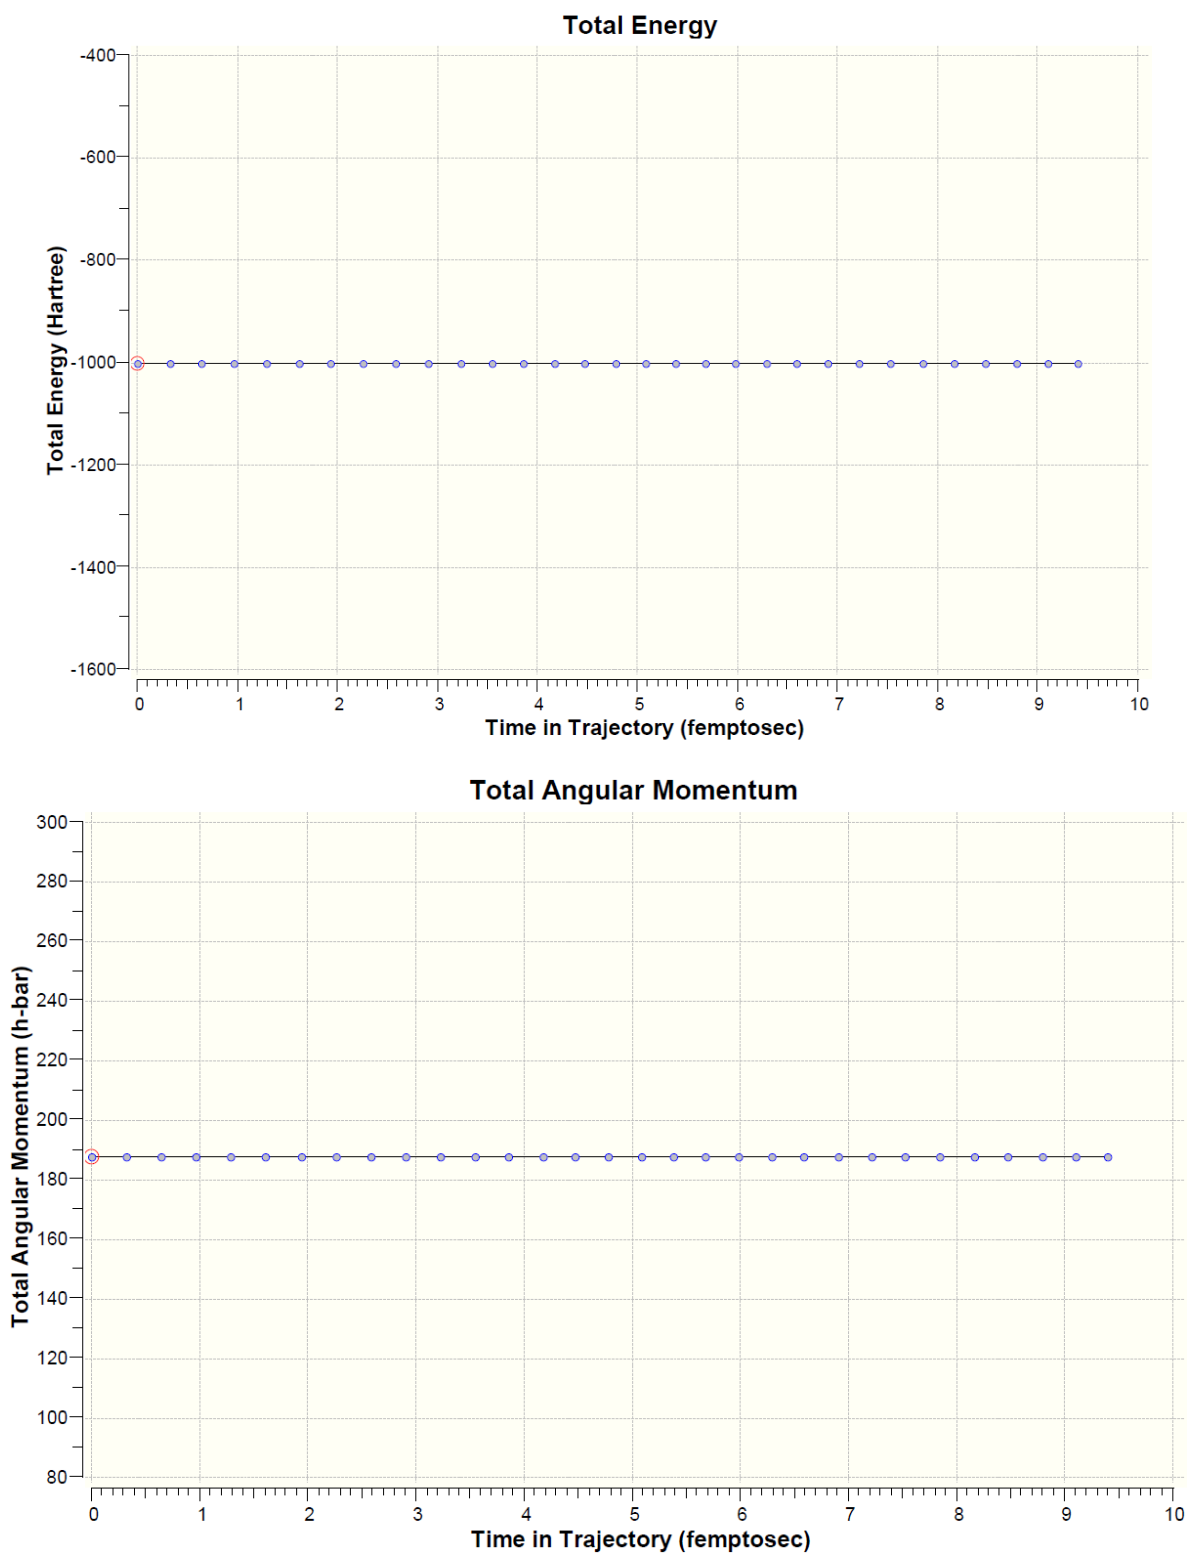

**Fig. S2 (End)**

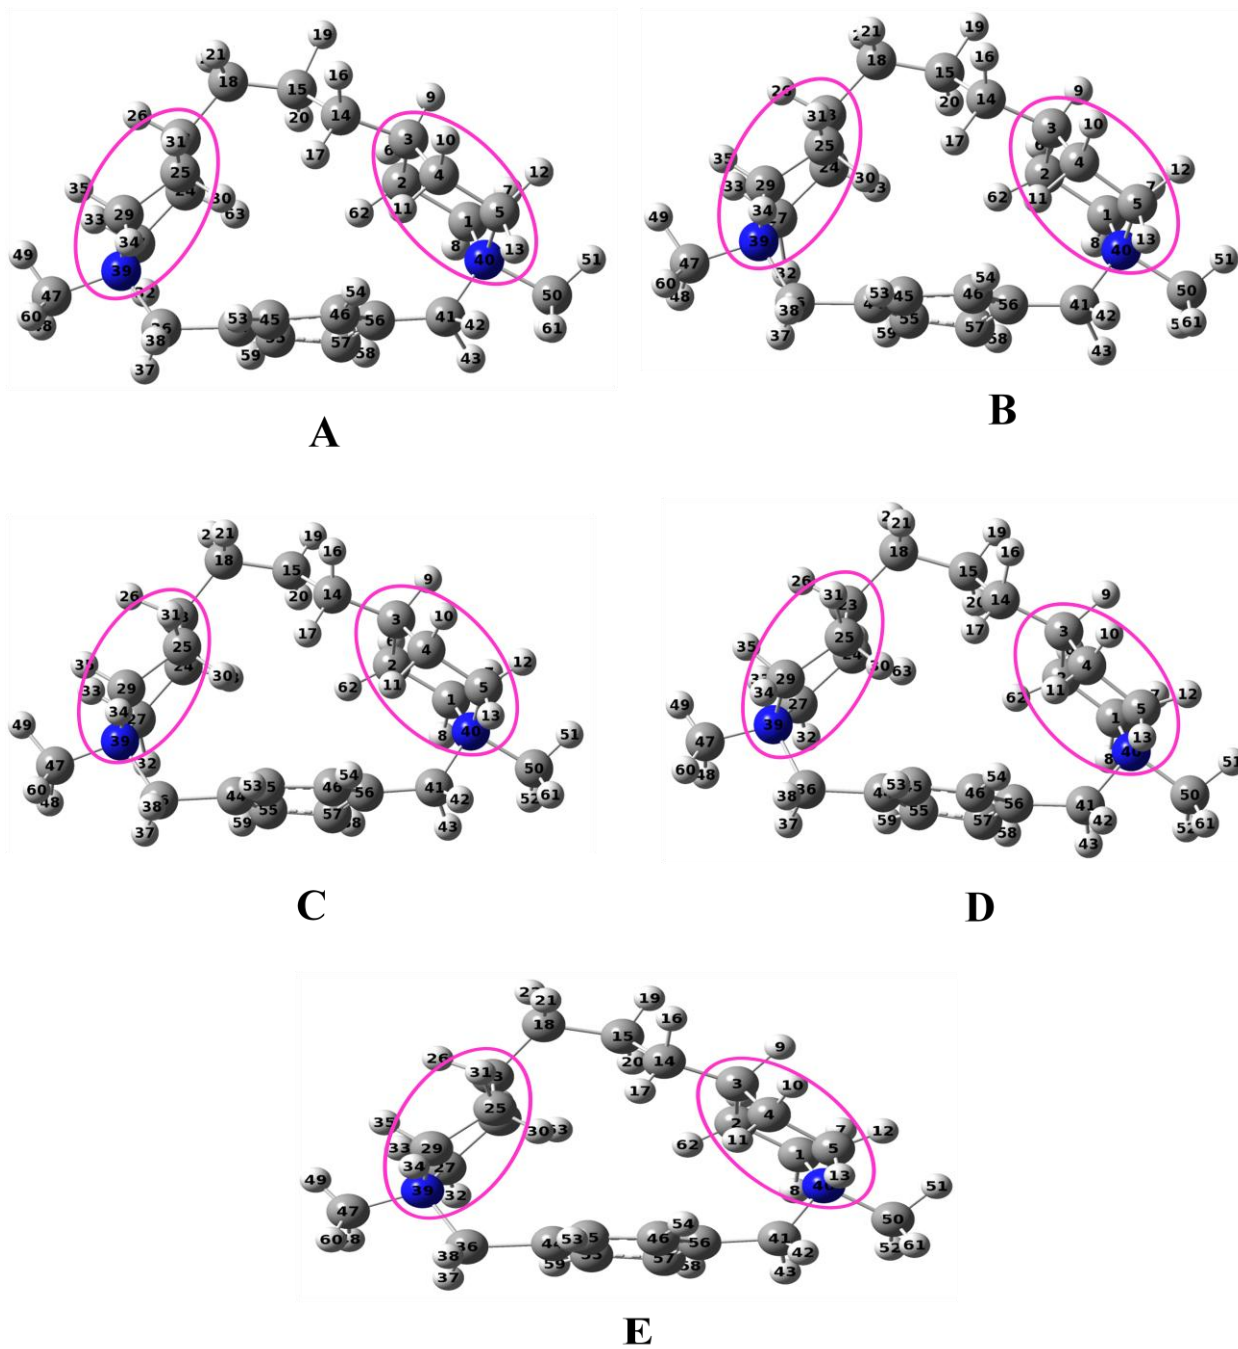

Fig. S3
